# Supplementary material
Source: PubMed Central journal article supplement (PMC5661281)

## **SUPPLEMENTARY MATERIAL**

Table S1. Frequency and Odds Ratio (95% Confidence Interval) for Incident Chronic Kidney Disease by Quartile and Per Standard Deviation Higher Serum Endothelin-1 Level Stratified by Sex

Table S2. Frequency and Odds Ratio (95% Confidence Interval) for Incident Chronic Kidney Disease by Quartile and Per Standard Deviation Higher Serum Endothelin-1 Level Stratified by Diabetes Status

Table S3. Frequency and Odds Ratio (95% Confidence Interval) for Incident Chronic Kidney Disease by Quartile and Per Standard Deviation Higher Serum Endothelin-1 Level Stratified by Hypertension Status

Table S4. Baseline Characteristics of Included vs. Excluded Jackson Heart Study Participants

Figure S1. Kernel Density Plot of Log-Transformed Baseline Serum Endothelin-1 Levels by Sex

Table S1. Frequency and Odds Ratio (95% Confidence Interval) for Incident Chronic Kidney Disease<sup>a</sup> by Quartile and Per Standard Deviation Higher Serum Endothelin-1 Level

Stratified by Sex

|                                                        | Quartile of Endothelin-1 (Range) |                              |                              |                              |                      | Continuous Endothelin-1                  |         |
|--------------------------------------------------------|----------------------------------|------------------------------|------------------------------|------------------------------|----------------------|------------------------------------------|---------|
|                                                        | Quartile 1:<br>0.1-1.0 pg/mL     | Quartile 2:<br>1.1-1.3 pg/mL | Quartile 3:<br>1.4-1.6 pg/mL | Quartile 4:<br>1.7-9.6 pg/mL | P-value<br>for trend | Frequency or<br>OR (95% CI) <sup>b</sup> | P-value |
| <b>Men</b>                                             |                                  |                              |                              |                              |                      |                                          |         |
| Incident CKD, % (n/N) <sup>a</sup>                     | 3.1% (13/418)                    | 8.4% (29/347)                | 5.9% (16/273)                | 8.9% (25/282)                | 0.005                | 6.3% (83/1,320)                          | --      |
| Unadjusted                                             | 1 [Ref]                          | 2.84 (1.45, 5.55)            | 1.94 (0.92, 4.10)            | 3.03 (1.52, 6.03)            | 0.008                | 1.28 (1.08, 1.53)                        | 0.006   |
| Adjusted for age                                       | 1 [Ref]                          | 2.57 (1.30, 5.05)            | 1.64 (0.77, 3.49)            | 2.63 (1.31, 5.27)            | 0.03                 | 1.25 (1.04, 1.52)                        | 0.02    |
| Adjusted for age and risk factors <sup>c</sup>         | 1 [Ref]                          | 2.39 (1.02, 5.62)            | 1.86 (0.72, 4.79)            | 2.26 (0.90, 5.65)            | 0.16                 | 1.23 (0.97, 1.57)                        | 0.09    |
| Adjusted for age, risk factors <sup>c</sup> , and eGFR | 1 [Ref]                          | 2.54 (1.07, 5.99)            | 1.89 (0.73, 4.86)            | 2.38 (0.95, 5.99)            | 0.14                 | 1.24 (0.97, 1.59)                        | 0.08    |
| <b>Women</b>                                           |                                  |                              |                              |                              |                      |                                          |         |
| Incident CKD, % (n/N) <sup>a</sup>                     | 4.6% (37/801)                    | 5.9% (33/558)                | 8.8% (35/396)                | 8.6% (40/463)                | 0.008                | 6.5% (145/2,218)                         | --      |
| Unadjusted                                             | 1 [Ref]                          | 1.30 (0.80, 2.10)            | 2.00 (1.24, 3.23)            | 1.95 (1.23, 3.10)            | 0.001                | 1.26 (1.09, 1.46)                        | 0.002   |
| Adjusted for age                                       | 1 [Ref]                          | 1.08 (0.66, 1.78)            | 1.50 (0.91, 2.47)            | 1.27 (0.78, 2.05)            | 0.20                 | 1.12 (0.96, 1.32)                        | 0.16    |
| Adjusted for age and risk factors <sup>c</sup>         | 1 [Ref]                          | 1.41 (0.78, 2.56)            | 1.48 (0.80, 2.76)            | 1.57 (0.88, 2.82)            | 0.15                 | 1.15 (0.97, 1.38)                        | 0.11    |

|                                                        |         |                   |                   |                   |      |                   |      |
|--------------------------------------------------------|---------|-------------------|-------------------|-------------------|------|-------------------|------|
| Adjusted for age, risk factors <sup>c</sup> , and eGFR | 1 [Ref] | 1.44 (0.79, 2.63) | 1.50 (0.80, 2.79) | 1.58 (0.87, 2.85) | 0.15 | 1.16 (0.97, 1.40) | 0.11 |
|--------------------------------------------------------|---------|-------------------|-------------------|-------------------|------|-------------------|------|

---

<sup>a</sup> Incident chronic kidney disease = visit 3 eGFR <60 mL/min/1.73 m<sup>2</sup> and ≥30% eGFR decline from visit 1 to visit 3; N=all participants without CKD at baseline with non-missing endothelin-1 values within each endothelin-1 quartile

<sup>b</sup> Odds ratio (95% confidence interval) for incident chronic kidney disease<sup>a</sup> per one standard deviation higher endothelin-1 level (0.62 pg/mL)

<sup>c</sup> Risk factors: body mass index, smoking, hypertension, anti-hypertensive medication use, hemoglobin A1c, diabetes, total and high-density lipoprotein cholesterol, history of cardiovascular disease, C-reactive protein, hematocrit

CI, confidence interval; CKD, chronic kidney disease; eGFR, estimated glomerular filtration rate; OR, odds ratio

Table S2. Frequency and Odds Ratio (95% Confidence Interval) for Incident Chronic Kidney Disease<sup>a</sup> by Quartile and Per Standard Deviation Higher Serum Endothelin-1 Level Stratified by Diabetes Status

|                                                             | Quartile of Endothelin-1 (Range) |                   |                   |                   |           | Continuous Endothelin-1  |         |
|-------------------------------------------------------------|----------------------------------|-------------------|-------------------|-------------------|-----------|--------------------------|---------|
|                                                             | Quartile 1:                      | Quartile 2:       | Quartile 3:       | Quartile 4:       | P-value   | Frequency or             | P-value |
|                                                             | 0.1-1.0 pg/mL                    | 1.1-1.3 pg/mL     | 1.4-1.6 pg/mL     | 1.7-9.6 pg/mL     | for trend | OR (95% CI) <sup>b</sup> |         |
| Diabetes                                                    |                                  |                   |                   |                   |           |                          |         |
| Incident CKD, % (n/N) <sup>a</sup>                          | 12.3% (26/212)                   | 16.7% (24/144)    | 19.9% (26/131)    | 13.3% (20/151)    | 0.23      | 15.1% (96/643)           | --      |
| Unadjusted                                                  | 1 [Ref]                          | 1.43 (0.78, 2.61) | 1.77 (0.98, 3.21) | 1.09 (0.58, 2.04) | 0.52      | 1.05 (0.85, 1.30)        | 0.65    |
| Adjusted for age and sex                                    | 1 [Ref]                          | 1.38 (0.75, 2.52) | 1.65 (0.90, 3.01) | 1.02 (0.54, 1.92) | 0.70      | 1.04 (0.83, 1.29)        | 0.75    |
| Adjusted for age, sex, and risk factors <sup>c</sup>        | 1 [Ref]                          | 1.37 (0.61, 3.11) | 2.03 (0.90, 4.60) | 1.10 (0.48, 2.54) | 0.65      | 1.11 (0.84, 1.46)        | 0.45    |
| Adjusted for age, sex, risk factors <sup>c</sup> , and eGFR | 1 [Ref]                          | 1.45 (0.64, 3.33) | 2.07 (0.91, 4.68) | 1.14 (0.49, 2.64) | 0.61      | 1.12 (0.85, 1.47)        | 0.43    |
| No Diabetes                                                 |                                  |                   |                   |                   |           |                          |         |
| Incident CKD, % (n/N) <sup>a</sup>                          | 2.4% (24/1,007)                  | 5.0% (38/760)     | 4.7% (25/537)     | 7.6% (45/593)     | <0.001    | 4.6% (132/2,914)         | --      |
| Unadjusted                                                  | 1 [Ref]                          | 2.16 (1.28, 3.63) | 2.00 (1.13, 3.54) | 3.36 (2.03, 5.58) | <0.001    | 1.36 (1.19, 1.56)        | <0.001  |
| Adjusted for age and sex                                    | 1 [Ref]                          | 1.78 (1.05, 3.04) | 1.44 (0.80, 2.60) | 2.30 (1.37, 3.88) | 0.005     | 1.26 (1.09, 1.45)        | 0.001   |
| Adjusted for age, sex, and risk factors <sup>c</sup>        | 1 [Ref]                          | 2.00 (1.08, 3.69) | 1.55 (0.79, 3.07) | 2.35 (1.26, 4.35) | 0.02      | 1.27 (1.09, 1.48)        | 0.003   |

|                                                             |         |                   |                   |                   |      |                   |       |
|-------------------------------------------------------------|---------|-------------------|-------------------|-------------------|------|-------------------|-------|
| Adjusted for age, sex, risk factors <sup>c</sup> , and eGFR | 1 [Ref] | 2.00 (1.08, 3.71) | 1.53 (0.77, 3.04) | 2.31 (1.24, 4.30) | 0.03 | 1.28 (1.09, 1.50) | 0.002 |
|-------------------------------------------------------------|---------|-------------------|-------------------|-------------------|------|-------------------|-------|

<sup>a</sup> Incident chronic kidney disease = visit 3 eGFR <60 mL/min/1.73 m<sup>2</sup> and ≥30% eGFR decline from visit 1 to visit 3; N=all participants without CKD at baseline with non-missing endothelin-1 values within each endothelin-1 quartile

<sup>b</sup> Odds ratio (95% confidence interval) for incident chronic kidney disease<sup>a</sup> per one standard deviation higher endothelin-1 level (0.62 pg/mL)

<sup>c</sup> Risk factors: body mass index, smoking, hypertension, anti-hypertensive medication use, hemoglobin A1c, total and high-density lipoprotein cholesterol, history of cardiovascular disease, C-reactive protein, hematocrit

CI, confidence interval; CKD, chronic kidney disease; eGFR, estimated glomerular filtration rate; OR, odds ratio

Table S3. Frequency and Odds Ratio (95% Confidence Interval) for Incident Chronic Kidney Disease<sup>a</sup> by Quartile and Per Standard Deviation Higher Serum Endothelin-1 Level Stratified by Hypertension Status

|                                                             | Quartile of Endothelin-1 (Range) |                              |                              |                              |                      | Continuous Endothelin-1                  |         |
|-------------------------------------------------------------|----------------------------------|------------------------------|------------------------------|------------------------------|----------------------|------------------------------------------|---------|
|                                                             | Quartile 1:<br>0.1-1.0 pg/mL     | Quartile 2:<br>1.1-1.3 pg/mL | Quartile 3:<br>1.4-1.6 pg/mL | Quartile 4:<br>1.7-9.6 pg/mL | P-value<br>for trend | Frequency or<br>OR (95% CI) <sup>b</sup> | P-value |
| Hypertension                                                |                                  |                              |                              |                              |                      |                                          |         |
| Incident CKD, % (n/N) <sup>a</sup>                          | 6.7% (41/614)                    | 10.4% (52/502)               | 10.0% (40/402)               | 11.8% (59/502)               | 0.03                 | 9.5% (192/2,032)                         | --      |
| Unadjusted                                                  | 1 [Ref]                          | 1.61 (1.05, 2.48)            | 1.54 (0.98, 2.43)            | 1.86 (1.23, 2.83)            | 0.007                | 1.21 (1.07, 1.36)                        | 0.003   |
| Adjusted for age and sex                                    | 1 [Ref]                          | 1.46 (0.95, 2.27)            | 1.29 (0.81, 2.06)            | 1.55 (1.01, 2.38)            | 0.09                 | 1.16 (1.02, 1.32)                        | 0.02    |
| Adjusted for age, sex, and risk factors <sup>c</sup>        | 1 [Ref]                          | 1.84 (1.10, 3.10)            | 1.37 (0.78, 2.41)            | 1.95 (1.17, 3.28)            | 0.04                 | 1.22 (1.06, 1.40)                        | 0.005   |
| Adjusted for age, sex, risk factors <sup>c</sup> , and eGFR | 1 [Ref]                          | 1.87 (1.11, 3.16)            | 1.37 (0.78, 2.41)            | 1.98 (1.18, 3.34)            | 0.04                 | 1.23 (1.07, 1.41)                        | 0.004   |
| No Hypertension                                             |                                  |                              |                              |                              |                      |                                          |         |
| Incident CKD, % (n/N) <sup>a</sup>                          | 1.5% (9/605)                     | 2.5% (10/403)                | 4.1% (11/267)                | 2.5% (6/243)                 | 0.13                 | 2.4% (36/1,528)                          | --      |
| Unadjusted                                                  | 1 [Ref]                          | 1.69 (0.68, 4.18)            | 2.85 (1.16, 6.95)            | 1.68 (0.59, 4.76)            | 0.11                 | 1.17 (0.82, 1.66)                        | 0.39    |
| Adjusted for age and sex                                    | 1 [Ref]                          | 1.46 (0.58, 3.67)            | 2.32 (0.94, 5.74)            | 1.32 (0.46, 3.78)            | 0.31                 | 1.06 (0.73, 1.56)                        | 0.75    |
| Adjusted for age, sex, and risk factors <sup>c</sup>        | 1 [Ref]                          | 2.58 (0.81, 8.21)            | 5.63 (1.75, 18.1)            | 2.33 (0.64, 8.53)            | 0.07                 | 1.23 (0.82, 1.85)                        | 0.31    |

|                                                             |         |                   |                   |                   |      |                   |      |
|-------------------------------------------------------------|---------|-------------------|-------------------|-------------------|------|-------------------|------|
| Adjusted for age, sex, risk factors <sup>c</sup> , and eGFR | 1 [Ref] | 2.87 (0.89, 9.26) | 6.45 (1.97, 21.1) | 2.48 (0.65, 9.41) | 0.05 | 1.32 (0.86, 2.01) | 0.20 |
|-------------------------------------------------------------|---------|-------------------|-------------------|-------------------|------|-------------------|------|

<sup>a</sup> Incident chronic kidney disease = visit 3 eGFR <60 mL/min/1.73 m<sup>2</sup> and ≥30% eGFR decline from visit 1 to visit 3; N=all participants without CKD at baseline with non-missing endothelin-1 values within each endothelin-1 quartile

<sup>b</sup> Odds ratio (95% confidence interval) for incident chronic kidney disease<sup>a</sup> per one standard deviation higher endothelin-1 level (0.62 pg/mL)

<sup>c</sup> Risk factors: body mass index, smoking, hemoglobin A1c, diabetes, total and high-density lipoprotein cholesterol, history of cardiovascular disease, C-reactive protein, hematocrit

CI, confidence interval; CKD, chronic kidney disease; eGFR, estimated glomerular filtration rate; OR, odds ratio

Table S4. Baseline Characteristics<sup>a</sup> of Included vs. Excluded Jackson Heart Study Participants

|                                    | Included in<br>Cross-sectional<br>Analysis<br>(N=5,200) | Included in<br>Prospective<br>Analysis<br>(N=3,538) | Excluded from<br>Prospective<br>Analysis<br>(N=1,662) | P-<br>value <sup>b</sup> |
|------------------------------------|---------------------------------------------------------|-----------------------------------------------------|-------------------------------------------------------|--------------------------|
| Age, years                         | 55.4 (12.8)                                             | 53.9 (11.9)                                         | 58.6 (14.1)                                           | <0.001                   |
| Male sex, %                        | 36.7% (1,910)                                           | 37.3% (1,320)                                       | 35.5% (290)                                           | 0.21                     |
| Body mass index, kg/m <sup>2</sup> | 31.7 (7.2)                                              | 31.8 (7.2)                                          | 31.7 (7.4)                                            | 0.58                     |
| Smoking, %                         | 13.2% (682)                                             | 11.7% (412)                                         | 16.4% (270)                                           | <0.001                   |
| Systolic blood pressure, mmHg      | 127.0 (18.4)                                            | 125.5 (17.1)                                        | 130.2 (20.6)                                          | <0.001                   |
| Hypertension, %                    | 61.4% (3,192)                                           | 57.1% (2,020)                                       | 70.7% (1,172)                                         | <0.001                   |
| Antihypertensive medication use, % | 61.6% (2,607)                                           | 57.3% (1,633)                                       | 70.3% (974)                                           | <0.001                   |
| Hemoglobin A1c, %                  | 6.0 (1.3)                                               | 5.9 (1.2)                                           | 6.2 (1.5)                                             | <0.001                   |
| Diabetes, %                        | 21.8% (1,131)                                           | 18.1% (638)                                         | 29.7% (493)                                           | <0.001                   |
| Total cholesterol, mg/dL           | 199.3 (40.1)                                            | 198.9 (38.9)                                        | 200.3 (42.7)                                          | 0.25                     |
| HDL cholesterol, mg/dL             | 51.8 (14.6)                                             | 51.8 (14.3)                                         | 51.8 (15.4)                                           | 0.99                     |
| History of CVD, %                  | 10.7% (557)                                             | 7.4% (260)                                          | 17.9% (297)                                           | <0.001                   |
| C-reactive protein, mg/dL          | 0.51 (0.90)                                             | 0.48 (0.72)                                         | 0.58 (1.19)                                           | <0.001                   |
| Hematocrit, %                      | 39.3 (4.3)                                              | 39.6 (4.0)                                          | 38.8 (4.7)                                            | <0.001                   |
| eGFR, mL/min/1.73 m <sup>2</sup>   | 94.1 (22.0)                                             | 97.9 (17.7)                                         | 86.0 (27.5)                                           | <0.001                   |
| Urine albumin-to-creatinine ratio  |                                                         |                                                     |                                                       |                          |
| <30 mg/g                           | 86.8% (2,164)                                           | 90.1% (1,586)                                       | 78.8% (578)                                           | <0.001                   |
| 30-300 mg/g                        | 10.2% (255)                                             | 8.4% (8.4%)                                         | 14.6% (107)                                           |                          |



|                               |               |               |               |       |
|-------------------------------|---------------|---------------|---------------|-------|
| >300 mg/g                     | 3.0% (75)     | 1.5% (26)     | 6.7% (49)     |       |
| Dietary protein intake, g/day | 80.7 (37.4)   | 81.7 (37.4)   | 78.6 (37.2)   | 0.008 |
| Dietary sodium intake, mg/day | 3,446 (1,525) | 3,457 (1,508) | 3,423 (1,563) | 0.48  |
| Dietary acid load, mEq/day    | 11.0 (21.5)   | 11.6 (21.1)   | 9.5 (22.3)    | 0.002 |

---

<sup>a</sup> Mean (standard deviation) for continuous variables; % (n) for categorical variables

<sup>b</sup> p-value for comparison of “excluded from prospective analysis” vs. “included in prospective analysis”

HDL, high-density lipoprotein; CVD, cardiovascular disease; eGFR, estimated glomerular filtration rate

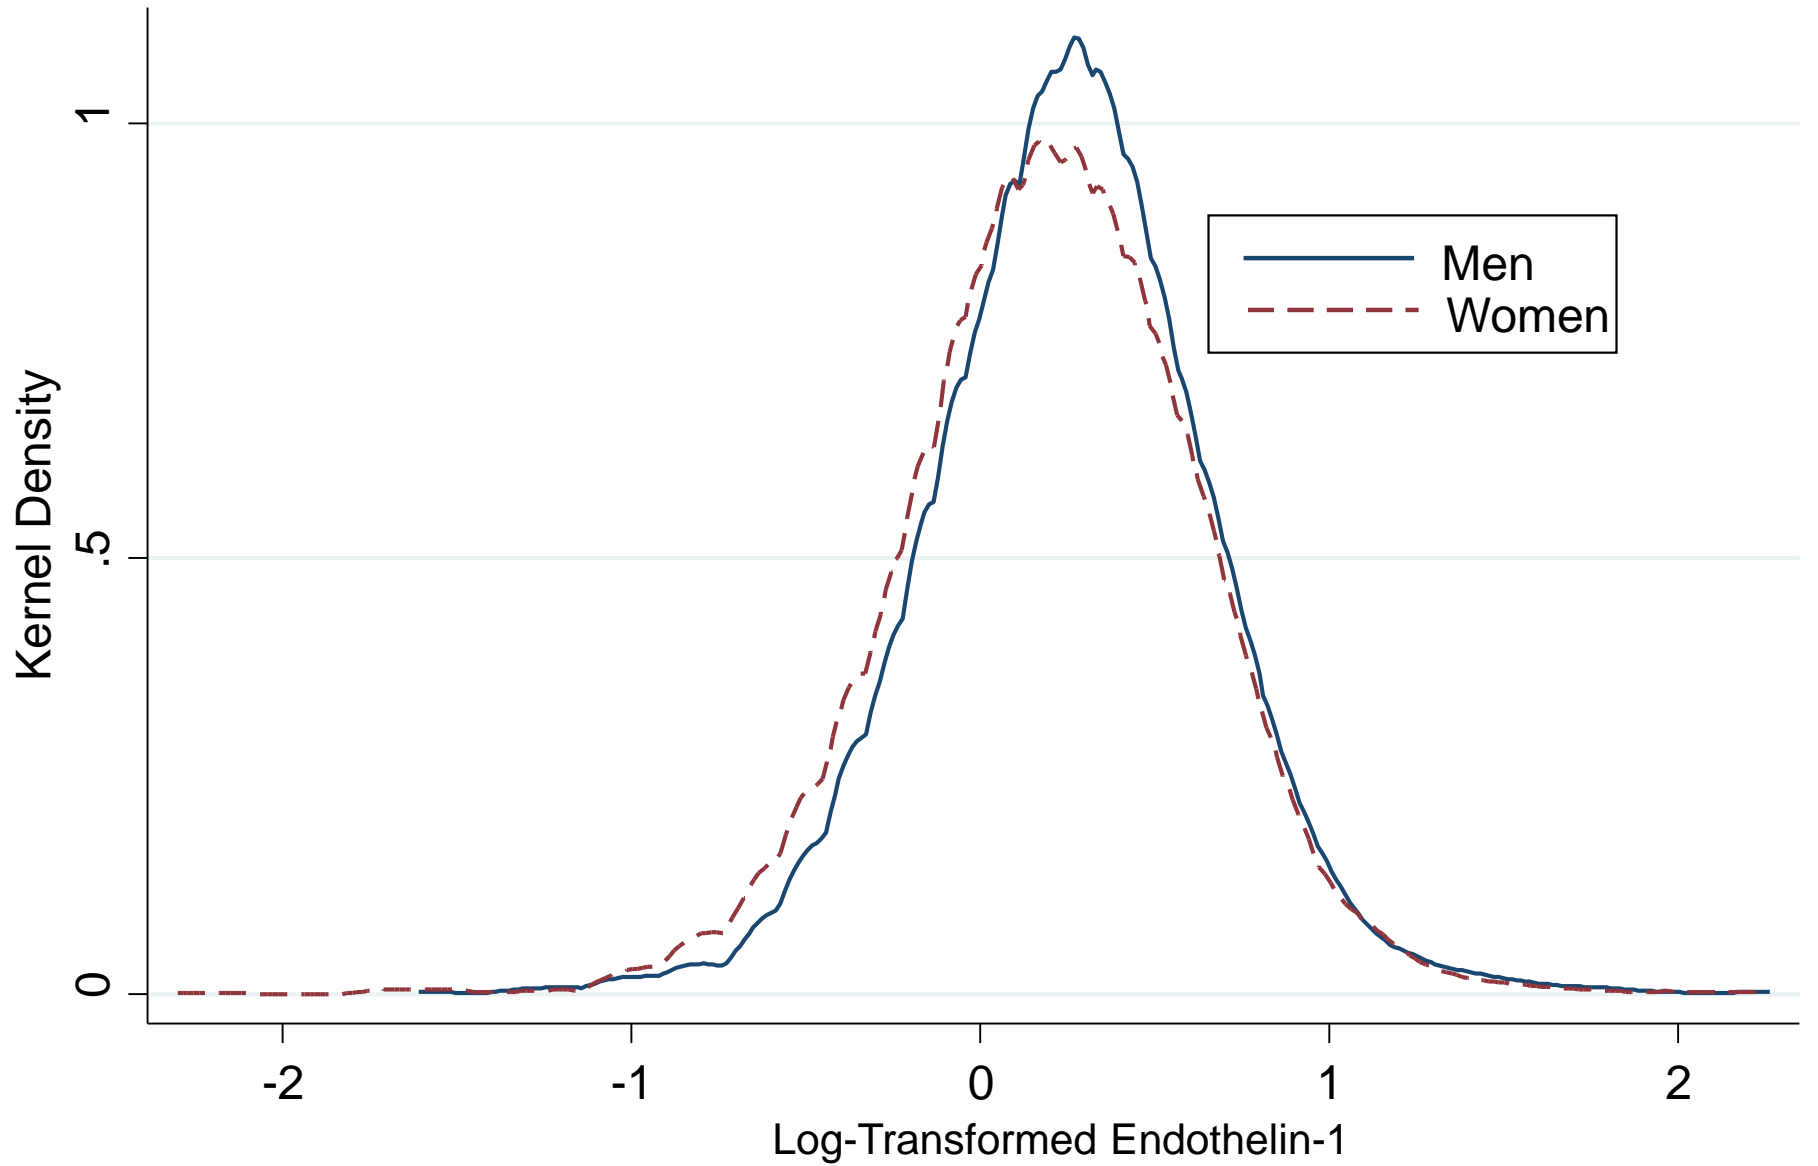

Supplement: ASN.2016111236SupplementaryData.pdf [file ASN.2016111236SupplementaryData.pdf]
